# Supplementary material for: Vitamin B5 supports MYC oncogenic metabolism and tumor progression in breast cancer
Source: PubMed Central journal article supplement (PMC10663155; doi:10.1038/s42255-023-00915-7), 2023-11-09
Supplement: 42255_2023_915_MOESM8_ESM.pdf [file 42255_2023_915_MOESM8_ESM.pdf]

Fig 4j

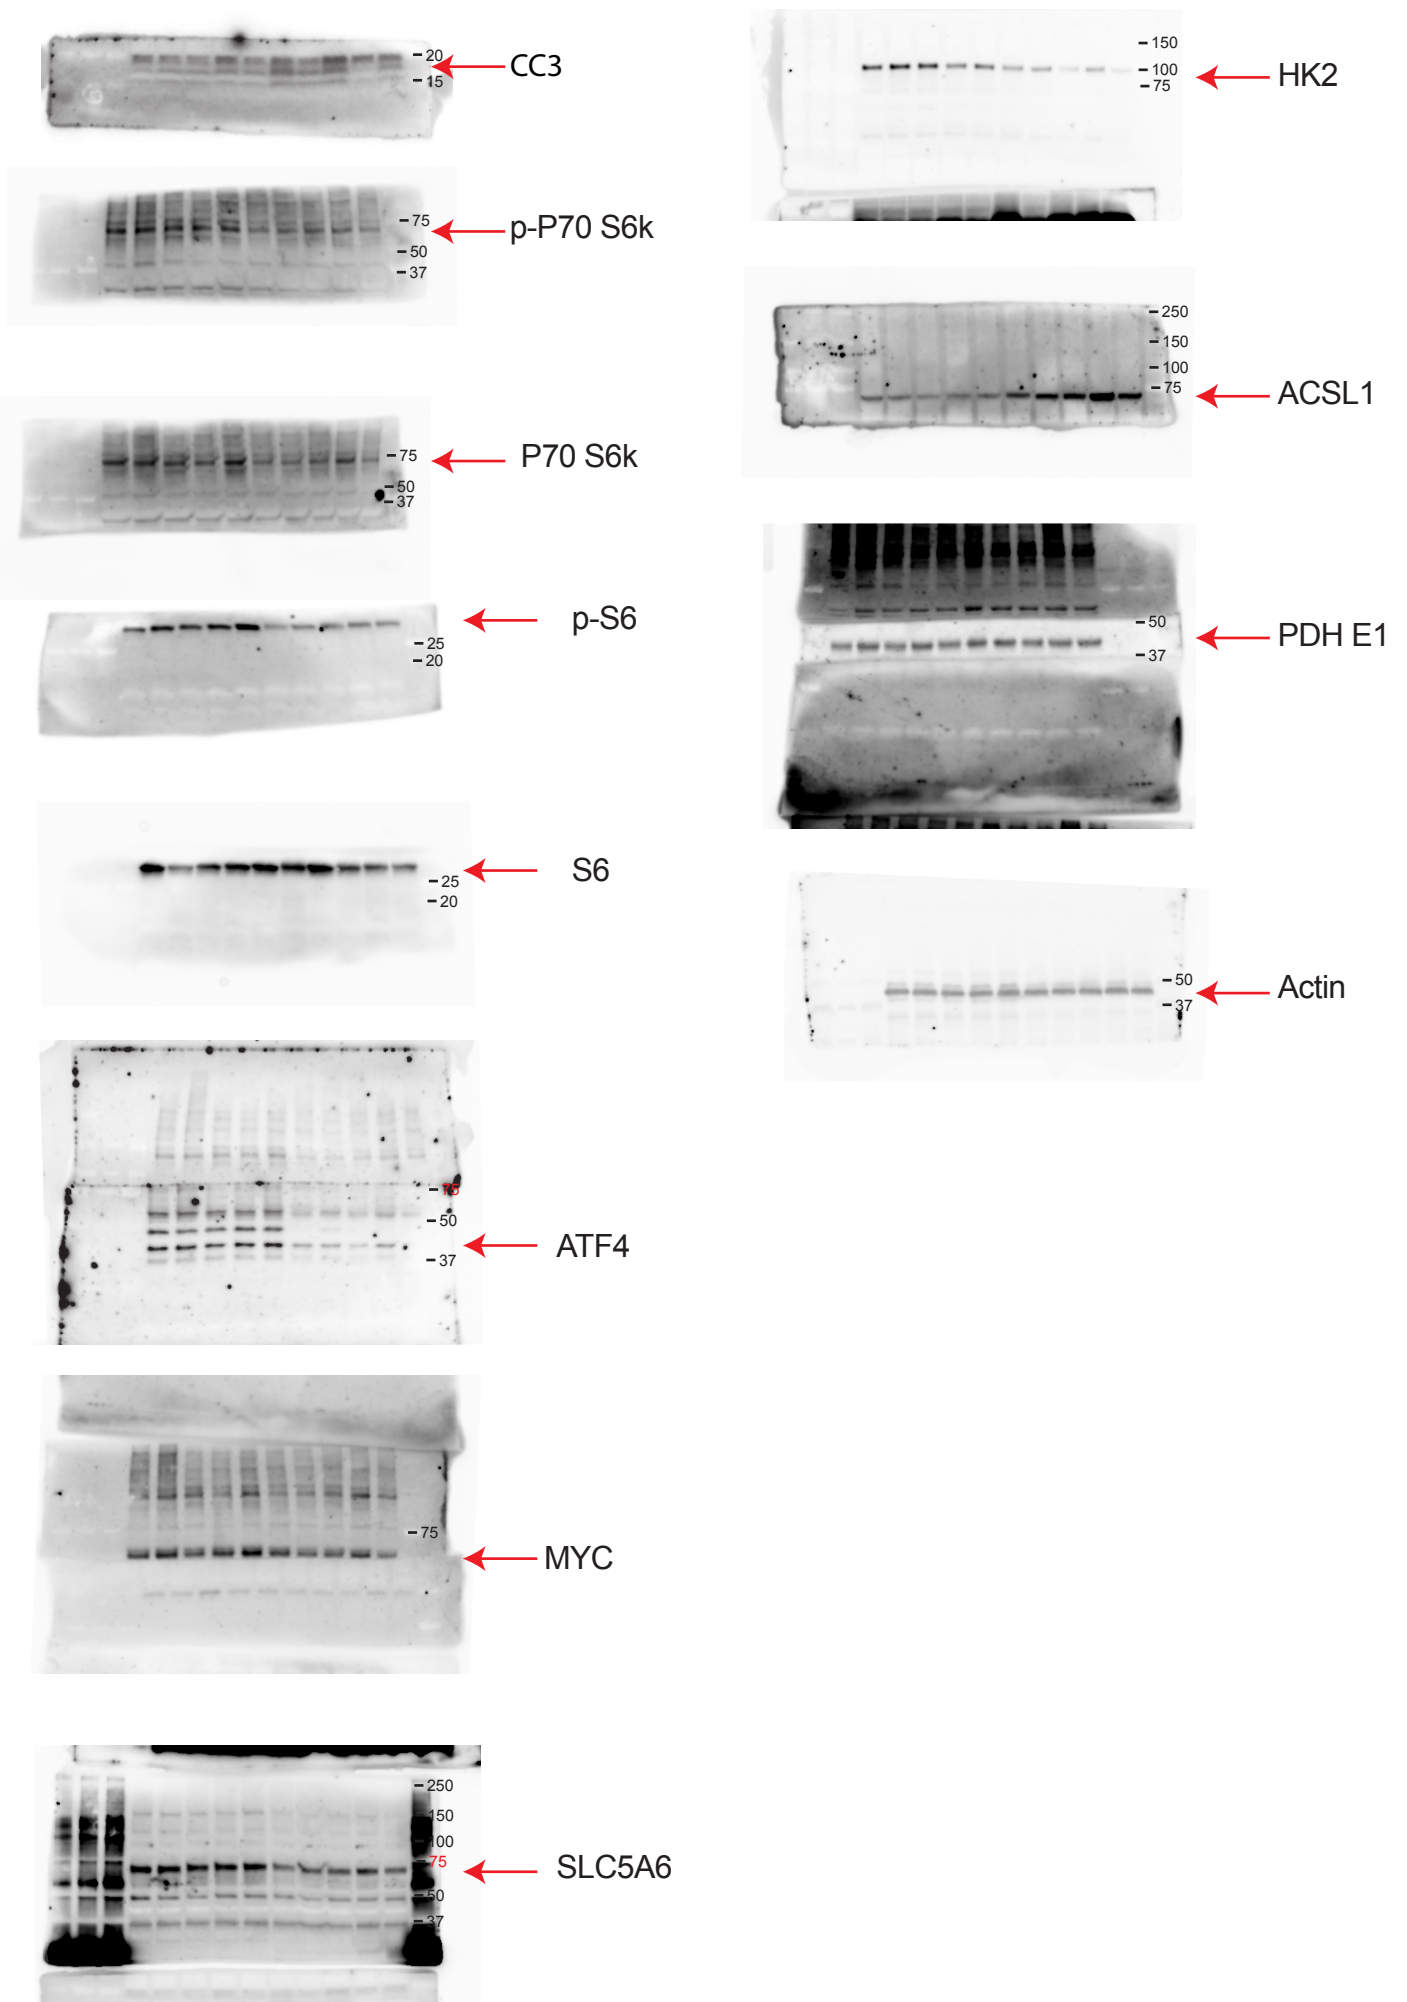

Fig 4I

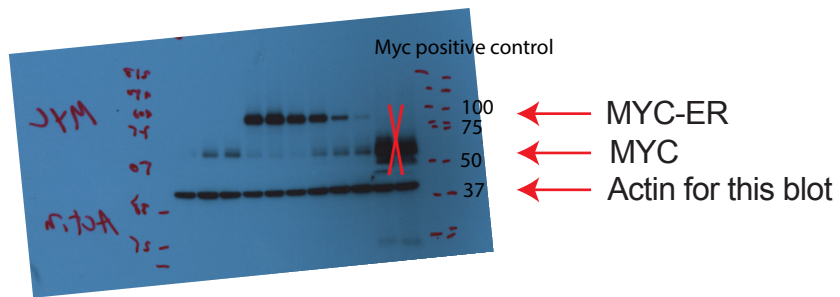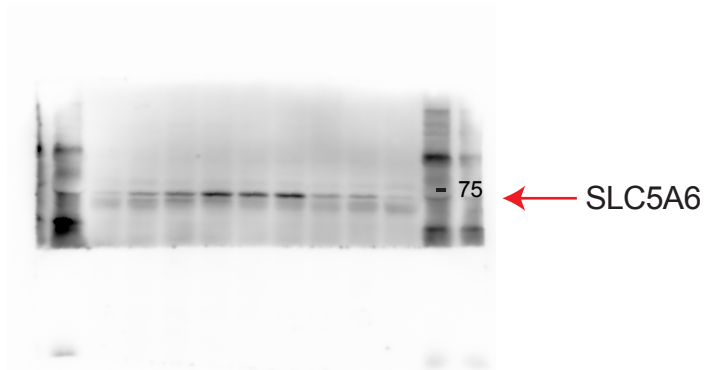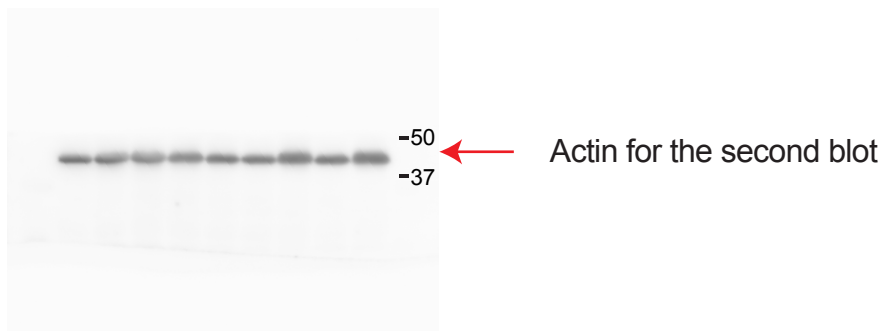

The same lysates were used for these runs, but once run with a positive control for Myc and once without. Top blot was converted to black and white in the manuscript
