# Supplementary material for: Vitamin B5 supports MYC oncogenic metabolism and tumor progression in breast cancer
Source: PubMed Central journal article supplement (PMC10663155; doi:10.1038/s42255-023-00915-7), 2023-11-09

Ex Fig 6e Western Blots

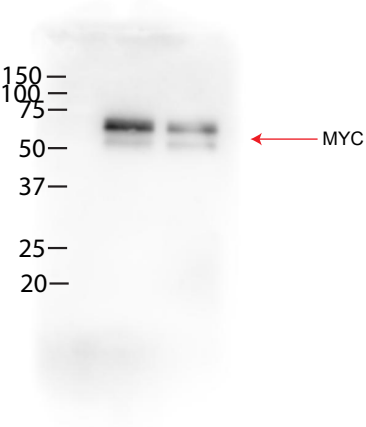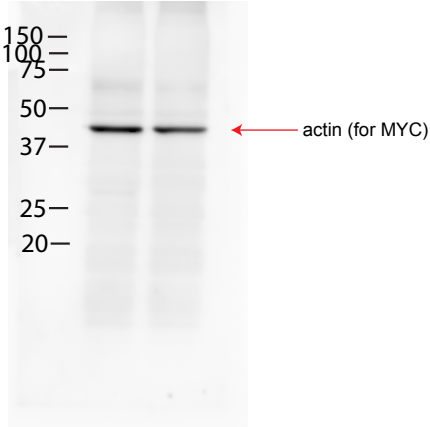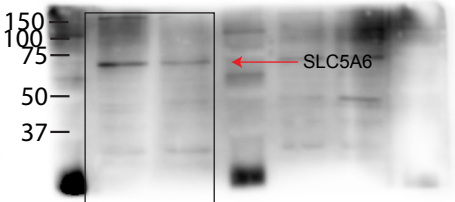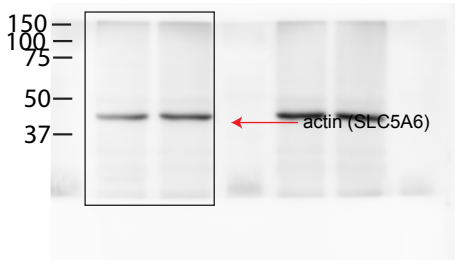

Ex Fig 6c Western Blots

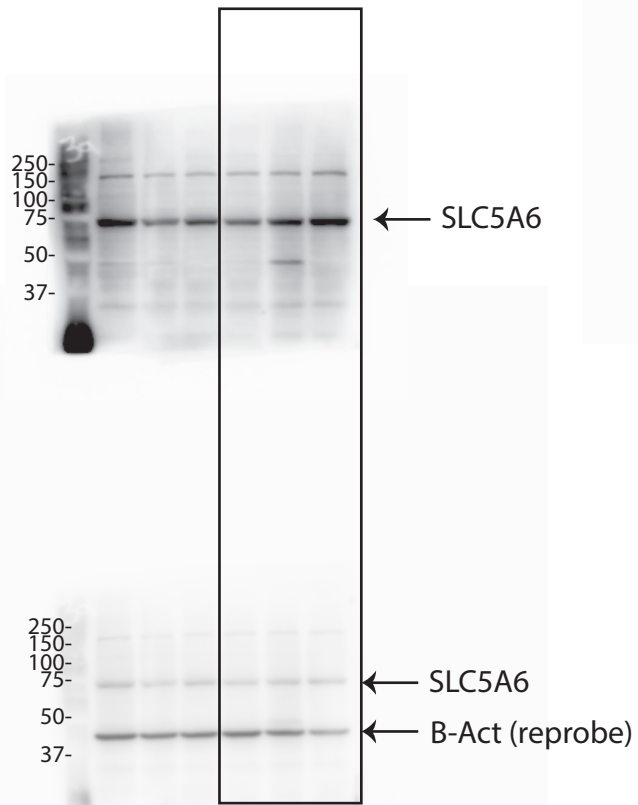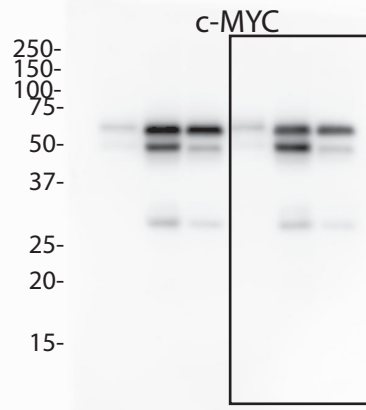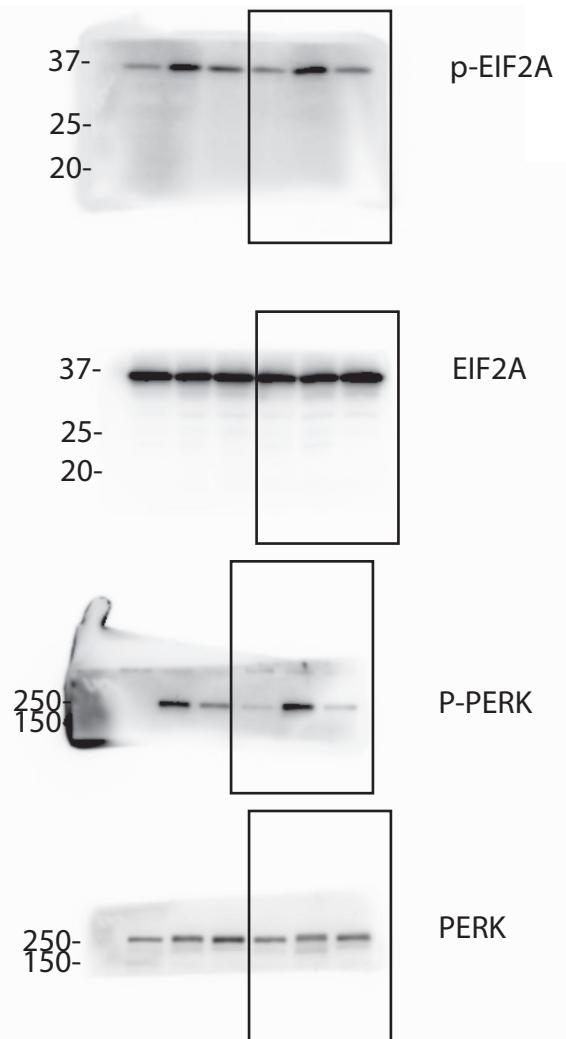

Ex Fig 6a Western Blots

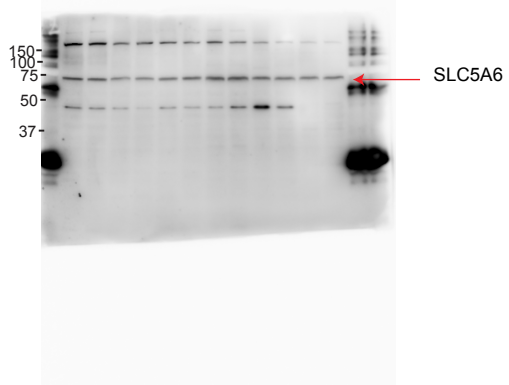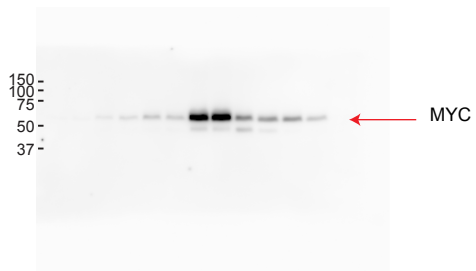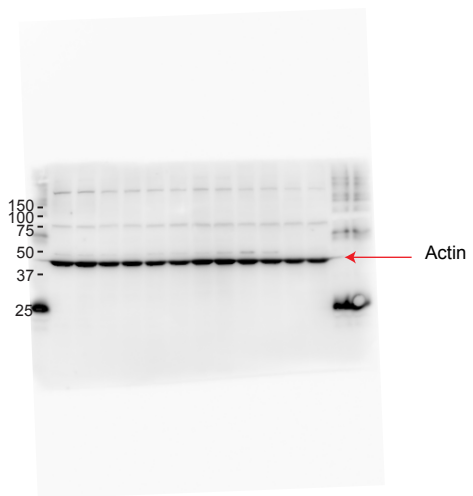

Supplement: 42255_2023_915_MOESM13_ESM.pdf [file 42255_2023_915_MOESM13_ESM.pdf]
